# Supplementary material
Source: publisher site journal article supplement (https://www.dovepress.com/article/383482)
Supplement: Supplementary file 1 [file get_supplementary_file.php]

Supplementary Appendix

Table 1. Table of search terms for a MEDLINE search strategy

|  | **Concept 1** | **Concept 2** | **Concept 3** | **Concept 4** |
| --- | --- | --- | --- | --- |
| **Key concepts** | Determinants | Exercise / physical activity | Adherence | Metabolic syndrome |
| Free text terms / natural language terms | Determinant / determin*  Factor  Contribut*  Cause  Influence  Predictor / predict*  Reason  Facilitator / facilitat*  Enable*  Motivation  Motivator  Motive  Motive factors  Driver  Incentive  Barrier  Deterr*  Indicator  Indicat*  Association  Regression | Exercise  Exercise therapy  Exercise training  Physical exercise  Physical activity  EPA  Physical training    Fitness  Training  Sport  Muscular exercise  Leisure time physical activity  Aerobic  Aerobic exercise  Aerobic training  Resistance training  Strength endurance  Strength training | Exercise adherence  Exercise non-adherence  Adherence  adherence behavio*  Compliance  Concordance  Co-operation  Cooperation  Collaboration  Partnership  Engagement  Participation  Motivation  Non-adhere*  Nonadhere*  Noncompliance  Non-compliance  Consistent  Consistency | Metabolic syndrome  Metabolic syn*  MetS  Metabolic disease  Syndrome X  Insulin resistance syndrome  Nutritional and metabolic disease*  Hypertriglyceridemic waist |
| Controlled vocabulary terms / subject terms |  | Exercise  Exercise Therapy  Resistance Training | Patient compliance  Treatment adherence and compliance | Metabolic syndrome |

Key: *, truncated search term.

Table 2. Data extraction of quantitative studies

| **Domain and Key Themes** | **Abuissa et al. (2005)38** | **Colom et al. (2019)40** | **Jansen et al. (2013)39** | **Kim et al. (2010)42** |
| --- | --- | --- | --- | --- |
| **Source of Data** | | | | |
| **Source of data (e.g. cohort, case control, randomised trial, registry data)** | Cross-sectional longitudinal | Cross-sectional based on baseline data of ongoing RCT | Cross-sectional longitudinal survey | Cross-sectional survey |
| **Participants** | | | | |
| **Participant eligibility and recruitment method (eg, consecutive participants, location, number of centres, setting, inclusion and exclusion criteria)** | Patients enrolled into an acute coronary syndrome (ACS) registry at two Kansas City hospitals were screened for MetS using the NCEP-ATP-III criteria.  Exclusion: diabetic and metabolically normal patients | Participants were adults enrolled from primary care facilities dependent on University Hospital Son Espases in Spain, part of the PREDIMED-Plus trial.  Inclusion: BMI 27 or above, <40kg/m2, at least 3 components of MetS according to IDF criteria  Exclusion: participants living outside the city limits of Palma de Mallorca, those with no/<4 days of accelerometer data | Participants identified after population-based screening in the “Ijsselstein Screening for Central Obesity to Detect Metabolic Syndrome” study  Inclusion: MetS defined by NCEP-ATP-III  Exclusion: not specified | Convenience sample from one university hospital,  Inclusion: MetS defined by NCEP-ATP-III  Exclusion: not specified |
| **Participant description** | *Adults with MetS exercising at 1 year (n=92)*: mean age 59.6 years (± 11.7), 54/92 (58.7%) were male, 85/92 (92.4%) were Caucasian, 7/92 (7.6%) had COPD, 70/92 (76.1%) had hypertension, 17/92 (18.5%) had a history of MI, 1/92 (1.1%) had peripheral vascular disease, 3/92 (3.3%) alcohol abuse, 4/92 (4.3%) illicit drug use, 30/92 (32.2%) were current smokers, 20/92 (21.3%) were living alone, 29/92 (31.9%) suffered economic burden, mean BMI was 30.4, 40% were exercising at baseline  *Adults with MetS not exercising at 1 year (n=78)*: mean age 60.7 years, 43/78 (55.1%) were male, 62/78 (79.5%) were Caucasian, 5/78 (6.4%) had COPD, 65/78 (83.3%) had hypertension, 20/78 (25.6%) had a history of MI, 6/78 (7.7%) had peripheral vascular disease, 3/78 (3.8%) alcohol abuse, 5/78 (6.4%) illicit drug use, 26/78 (33.3%) were current smokers, 24/78 (31.2%) were living alone, 27/78 (35.1%) suffered economic burden, mean BMI was 32.1, 16.7% were exercising at baseline | Adults with MetS, 106/218 (48.6%) were male, 102/218 (46.8%) were >65 years old, mean age 65.2 years, 132/218 (60.6%) were educated to primary school level or less, 145/218 (67.1%) had excellent / very good / good self-rated health. | Adults with MetS, mean age 49.1 years (± 10.4), 234/473 (49.5%) were male, 443/473 (93.7%) were of Western ethnicity, 137/473 (29.3%) of higher educational level. Mean weight 93.3kg, mean BMI 30.5, mean waist circumference 101.1cm (men), 100.8cm (women), mean systolic BP 144.7mmHg, mean diastolic BP 88.6mmHg, mean fasting blood glucose 5.4mmol/L, mean HDL-C 1.1mmol/L (men), 1.3mmol/L (women), mean triglycerides 2.1mmol/L | Adults with MetS, mean age 53.3 years (± 10.7), 140/210 (67.1%) were male. 157/210 (74.8%) had attained at least high school education, 62/210 (29.5%) were smokers, 120/177 had high Waist Circ, 157/207 had high BP, 141/191 had high triglyc, 83/195 had low HDL chol and 130/207 had high FBG |
| **Details of treatments received (if relevant)** | N/A | Lifestyle intervention – energy-restricted traditional Mediterranean diet (MedDiet), PA promotion, behavioural support vs. energy-unrestricted MedDiet | Education – consequences of MetS were explained. Lifestyle advice including Dutch PA Guideline (DPAG) criteria | N/A |
| **Study dates** | Screened between March 1, 2001 and October 31, 2002 | Participants enrolled from 5th September 2013 to 31st October 2016, dataset was extracted on 15th January 2018 | Not specified – a 3-year follow-up period | Not specified |
| **Outcomes to be predicted** | | | | |
| **Definition and method for measurement of outcomes** | Proportion of people with MetS who self-reported they were exercising 1 year after discharge for ACS.  Exercise defined as moderate PA for 30 minutes at least 3 times a week, self-reported. | Self-reported PA measured with the Girona Heart Registry (REGICOR) Short Physical Activity Questionnaire.  Objectively measured moderate-to-vigorous PA (OM-MVPA) measure with wrist-worn triaxial accelerometer (GENEActiv). | Proportion of MetS patients that increased and decreased PA, measured by SQUASH (Short QUestionnaire to ASsess Health-enhancing physical activity) questionnaire with reference to DPAG. | 25-minute questionnaire including demographic and TTM (transtheoretical model) related questions, grouped into regular exerciser or non-regular exerciser based on Stages of Change from scale of readiness for exercise behaviour |
| **Was the same outcome definition (and method for measurement) used in all participants?** | Yes | Yes | Yes | Yes |
| **Were the outcomes assessed without knowledge of the candidate prognostic factors (that is, blinded)?** | Not specified but unlikely | Not specified but unlikely | Not specified but unlikely | Not specified but unlikely |
| **Time of outcome occurrence or summary of duration of follow-up** | Cross-sectional study. Follow up data collected 1 year after screening | Cross-sectional study. No follow up, data collected at screening and across a maximum of 9 days for accelerometer data | Cross-sectional study with data collected at baseline screening and 3 years after initial data collection | Cross-sectional study. No follow up, all data collected in one survey |
| **Prognostic factors (index and comparator prognostic factors)** | | | | |
| **Number and type of prognostic factors (eg, obtained from demographics, patient history, physical examination, additional testing, disease characteristics)** | 5 in total entered into multivariable logistic regression analysis:   - Age - Gender - Race - BMI - Exercise at baseline | 16 in total:  4 demographic:   - Age - Gender - Education level - Self-rated health   12 geographical/climate:   - Precipitation - Distance to the coast - Healthy routes contained or intersected by buffer - Distance to nearest sports facility - Distance to nearest beach - Distance to nearest park - Walk-friendly routes contained or intersected by buffer - No. sports facilities contained or intersected by buffer - No. parks contained or intersected by buffer - Areas of parks contained or intersected by buffer - No. Public Open Spaces (POS) contained or intersected by buffer - Areas of POS contained or intersected by buffer | 12 in total:  4 demographic:   - Age - Gender - Ethnicity - Education level   2 general health:   - Weight - BMI   6 MetS specific:   - Waist circumference - Systolic BP - Diastolic BP - FBG - HDL-C - Triglycerides | 13 in total:  1 demographic: smoking  2 MetS specific:   - High blood pressure - HDL cholesterol   10 TTM-related:   - Consciousness raising - Dramatic relief - Self-re-evaluation - Social liberation - Stimulus control - Pros (positive aspects or benefits of adopting or maintaining exercise behaviour) - Cons (negative aspects, barriers or costs of adopting or maintaining exercise behaviour) - Self-efficacy   Education not included anywhere |
| **Definition and method for measurement of prognostic factors** | Questionnaire / interviews (unclear). Self-reported exercise – unclear if this was a Yes/No to meeting 30 minutes three times weekly, or if it was exercise levels reported by patients | Self-reported questionnaire for age, sex, education level and self-rated health.  POS and other geographical factors reported based on distances from participants’ residence, as reported at baseline. ArcGIS 10.5.1 software used to apply a sausage network buffer methodology (using only the walking street network, area within 1km and 0.5km walkable street distance of each participant’s residence, with a buffer for each street).  Accumulated precipitation for each day during accelerometer wearing period was collected from OpenData service of the Agencia Estatal de Meteorología (AEMET). | Questionnaire for ethnicity, education level. High education level is secondary education permitting entry to college.  SQUASH questionnaire for PA, measured in reference to DPAG.  Change in clinical measures between screening & follow up. Body weight, height, waist circumference and BP measured. Venous blood samples post overnight fast for FBG, HDL-C and triglycerides. | 25 minute questionnaire including demographic and TTM (transtheoretical model) related questions |
| **Timing of prognostic factor measurement (eg, at patient presentation, diagnosis, treatment initiation, at the end of surgery)** | At screening and at 1 year follow up | At baseline, and exercise data collected over a maximum of 9 consecutive 24-hour days | At screening and at 3 year follow up | At one time point only |
| **Were prognostic factors assessed blinded for outcome, and for each other (if relevant)?** | Not specified but unlikely | Not specified but unlikely | Not specified but unlikely | Not specified but unlikely |
| **Sample size** | | | | |
| **Was a sample size calculation conducted? Yes/No, page number** | No - sub-set of participants from registry who met eligibility criteria | No – sub-set of participants with sufficient data from a larger trial | No - sub-set of participants from registry who met eligibility criteria | Yes, 325 |
| **Number of participants** | 273 at screening, 170 at follow-up | 218 were eligible (335 enrolled) | 473 at screening, 194 at follow-up but final sample 168 | 210 |
| **Missing data** | | | | |
| **Details of attrition (loss to follow-up) and, for time-to-event outcomes, number of censored observations (ideally in each category for those categorical prognostic factors of interest)** | 103 (37.7% of sample) participants did not have follow-up data collected: 11 died, 40 did not answer the 1-year interview questions, and 52 were lost to follow-up  (62% retention) | None – n=218 participants  (100% retention) | At 3-year follow-up 67 participants no longer eligible (had moved, were critically ill, or other reasons)  20 participants excluded for whom no risk profile was recorded  (82% retention. 36% complete data) | None – n=210 participants  (100% retention) |
| **Handling of missing data (eg, complete case analysis, imputation, or other methods)** | Only participants with complete follow-up data were included | 218 participants included with no apparent missing data | Missing data on PA at baseline and follow-up were put with data for those who were not advised to increase PA | Missing cases were excluded |
| **Analysis** | | | | |
| **Modelling method (eg, linear, logistic, Cox, parametric survival, competing risks) regression)** | Multivariable logistic regression analysis | ANOVA, generalised additive mixed models (GAMMs) | Multiple logistic regression | ANOVA, MANOVA, logistic regression |
| **How modelling assumptions were checked; in particular, for time-to-event outcomes and the analysis of hazard ratios, the method for assessing non-proportional hazards (non-constant hazard ratios over time)** | Not specified | Not specified | Not specified | Model fit had x28 value of 10.489 (P=0.232), percentage of correct prediction was 89.6% |
| **Method for selection of prognostic factors for inclusion in multivariable modelling (eg, all candidate prognostic factors considered, preselection of established prognostic factors, retain only those significant from univariable analysis), and criteria used for any selection or exclusion (eg, P value, Akaike information criterion)** | Univariate analysis to identify potential predictor variables associated with exercise at 1 year. | GAMMs with Gaussian variance and identity link functions for continuous outcomes.  GAMMs with binomial variance and logit link for dichotomised outcomes.  Analyses of curvilinear relationship were conducted for each model observing Akaike Information Criterion (AIC). | Univariate logistic regression analysis. All variables associated with an increase/decrease in PA at P<0.10 entered in forward-stepwise binary logistic regression analysis to find independent predictors of increase/decrease in PA | Significant variables were chosen from a univariate test using MANOVA, Student t-test, Fisher exact test, or X2 test for each variable. Statistical significance was accepted for 2-sided P<0.05 |
| **Results** | | | | |
| **Unadjusted and adjusted prognostic effect estimates (eg, risk ratios, odds ratios, hazard ratios, mean differences) for each prognostic factor of interest, and the corresponding 95% confidence interval (or variance or standard error). Details of any non-linear relationships and whether modelling assumptions hold; in particular, for time-to-event outcomes, any evidence of non-proportional hazards (non-constant hazard ratios) for each prognostic factor of interest** | Significant independent predictors of exercise were routine exercise at the time of admission for ACS (odds ratio [OR] = 2.6, 95% confidence interval [CI] = 1.1–6.4), younger age (OR = 0.67 per 10-year increase [95% CI = 0.45–0.99]), and lower BMI (OR = 0.4 per 10-unit increase [95% CI = 0.17–0.91]).  Caucasian race and gender were not independently associated with exercise in the final model (OR = 1.68 [95% CI = 0.45–6.9] and OR = 0.79 [95% CI = 0.35–1.8], respectively) | Poorer self-rated health was associated with a lower level of PA (p<0.001). Women showed significantly lower OM-MVPA than men (p<0.001). Precipitation was not significantly associated with self-reported or objectively measured PA.  No statistically significant associations observed between POS or walk-friendly routes and self-reported leisure-time brisk walking or OM-MVPA.  No statistically significant associations between POS or walk-friendly routes in the 500m buffer and self-reported leisure-time brisk walking or OM-MVPA.  Significant interaction between distance of walk-friendly routes contained or intersected by the 1000m buffer and OM-MVPA (p = 0.028).  Positive significant association between distance of walk-friendly routes contained or intersected by the buffer and OM-MVPA in non-rainy periods (β = 1.812,  95% CI = 0.375–3.249; p = 0.015)  Increments of 1km of walk-friendly routes contained or intersected by the 1km sausage network walkable buffer were associated with an increase of 1.8min/day of OM-MVPA; however, during rainy periods, no significant association was found between walk-friendly routes and OM-MVPA.  Self-reported leisure time brisk walking and OM-MVPA were significantly and strongly correlated with each other. | Univariate logistic regression analysis: female gender [odds ratio (OR) = 3.67; 95% confidence interval (CI) 1.34–10.03; P = 0.01], weight (OR = 0.96; 95% CI 0.93–0.99; P = 0.02), and BMI (OR = 0.80; 95% CI 0.67–0.96; P = 0.02) were associated with an increase in PA.  Multiple logistic regression analysis: female gender (OR= 3.59; 95% CI 1.24–10.39; P = 0.02) and BMI (OR= 0.82; 95% CI 0.69–0.97; P = 0.02) were independent predictors of an increase in PA between screening and follow-up.  In the group who did fulfil DPAG at screening, age, gender, weight, BMI, waist circumference gender-specific z-score, educational level, and ethnicity were all not significantly associated with a decrease in physical activity. | People who were regular exercisers had higher HDL-C and used consciousness raising score, self-re-evaluation and self-liberation more than non-exercisers. Regular exercisers were less likely to use pros and cons.  HDL cholesterol [odds ratio (OR) = 1.075; 95% CI 1.016-1.137; P = 0.012], Consciousness raising (OR = 1.271; CI 1.042-1.551; P = 0.018), Self-re-evaluation (OR = 1.480; CI 1.068-2.051; P = 0.019), Self-liberation (OR = 2.310; CI 1.737-3.071; P = 0.000), Pros (OR = 0.676; CI 0.526-0.868; P = 0.002), Cons (OR = 0.726; CI 0.604-0.873; P = 0.001) |
| **For each extracted adjusted prognostic effect estimate of interest, the set of adjustment factors used** | Adjusted for age, gender, race, BMI, exercise at baseline | Not adjusted due to small sample size | Gender-specific z-scores calculated for waist circumference to take into account gender differences were used in the modelling | Age and sex adjusted |
| **Interpretation and discussion** | | | | |
| **Interpretation of presented results** | In people with MetS, 1 year after developing ACS, only about half of this population report exercising routinely three or more times a week. Older age, not exercising prior to admission, and a higher BMI are independent predictors of failing to adhere to this exercise recommendation. | Increments in km of walk-friendly routes contained or intersected by 1 km sausage network walkable buffer were associated with an increase in 10-minute bouts of OM-MVPA on non-rainy days.  POS not associated with self-reported or objectively measured PA in older adults with MetS.  POS or walk-friendly route not associated with compliance with WHO exercise recommendations. | In people with MetS who *did not* meet the DPAG at screening, female gender and a lower BMI are associated with an increase in PA (to meeting the DPAG). However, waist circumference gender-specific z-score, educational level, and ethnicity were not associated with increase in PA.  In people with MetS who *did* meet the DPAG, age, gender, weight, BMI, waist circumference gender-specific z-score, educational level and ethnicity were not associated with a decrease in PA.  Only one-third of the people that did not fulfil the DPAG criterion at baseline  achieved the target level of PA at follow-up. However, over a 3-year period, mean BMI and all metabolic syndrome components except for glucose level improved in all MetS patients. | Differences between pros, cons, and self-efficacy across stages of exercise were statistically significant, and self-efficacy was lower in precontemplation stages than all other stages – consistent with previous studies. Pros increase from pre-contemplation to maintenance, cons decrease from contemplation and preparation to maintenance – consistent with previous studies. Adults in regular exercise stages were more likely to have higher consciousness raising, self-re-evaluation, and self-liberation, compared to non-regular exercise stages – consistent with previous study. |
| **Comparison with other studies, discussion of generalisability, strengths, and limitations** | Strengths: higher participation rate (63%) than previous studies in similar populations (41%)  Limitations: patient self-report is a subjective measure of PA and could introduce bias. Large number of participants did not answer follow-up questions. Study undertaken in two midwestern centres in US, so regional differences limit ability to generalise findings | Results in line with previous results from PREDIMED study in another population in terms of POS and self-reported leisure time PA.  Strengths: based on baseline data of ongoing RCT. Advances in the exploration of the environment and PA, including rain as plausible effect modifier. Context-specific measures of PA i.e. self-reported leisure-time brisk walking and 10-minute bouts of OM-MVPA. Both PA measures were significantly correlated with each other. Wide range of POS evaluated.  Limitations: cross-sectional so cannot identify causality. Small sample size did not allow for stratified analyses and sensitivity analyses to control for age, sex, self-rated health or educational level. Less extreme rainfall in this area compared to other areas of Spain or other countries, limiting generalisability. | Results similar to other studies in terms of the proportion of participants increasing their PA over time, although follow-up is typically limited to 12 months in other studies.  Limitations: SQUASH questionnaire not a continuous measure of PA, unable to measure small increases in PA (only measured by fulfilling DPAG or not). Patients with a lower BMI and western ethnicity were more willing to participate in the follow-up measurements – this could have influenced the data on number of patients fulfilling DPAG criteria at follow-up. | Generalisability: findings could be used to develop strategies and interventions to increase regular exercise behaviour in Korean adults with MetS.  Limitations: not discussed |

Key: RCT, randomized control trial; NCEP-ATP-III, National Cholesterol Education Program Adult Treatment Panel III; BMI, body mass index; MetS, metabolic syndrome; IDF, International Diabetes Foundation; COPD, chronic obstructive pulmonary disease; BP, blood pressure; HDL-C, High-density lipoprotein-C; FBG, fasting blood glucose; PA, physical activity; ACS, acute coronary syndrome; REGICOR, Girona Heart Registry Short Physical Activity Questionnaire; OM-MVPA, objectively measured moderate to vigorous PA; SQUASH, Short Questionnaire to Assess Health-enhancing; DPAG, Dutch PA Guideline; TTM, Transtheoretical Model; POS, public open space; OR, odds ratio; CI, confidence interval; WHO, World Health Organization.

Table 3. Data extraction of qualitative studies

| **Study: Millstein et al. (2020)43** | |
| --- | --- |
| **Research parameters** | |
| **Research questions** | What are the perceptions of specific positive psychological constructs and the directionality of positive psychological constructs and PA, among people with MetS? |
| **Theoretical approach** | Not specified – general qualitative methods |
| **How data were collected** | Semi-structured individual phone interviews conducted by a clinical psychologist from June to November 2017 |
| **Population and sample selection** | |
| **Population the sample were recruited from** | Patients at academic medical centre’s primary care clinic willing to be contacted about research, English-speaking with at least 3 MetS risk factors |
| **How they were recruited** | A list was generated of people that met the inclusion criteria within past year, then screened against inclusion & exclusion criteria (purposive sampling) |
| **How many participants were recruited** | 23 (21 complete phone interviews) |
| **Inclusion criteria** | English-speaking, at least 3 MetS risk factors according to IDF 2009 criteria, willing and able to provide opinions on experience of living with chronic condition |
| **Exclusion criteria** | People with cognitive deficits and illness likely to lead to death within 6 months, people adherent to PA recommendations (150mins of moderate-vigorous PA or more in the last or typical week) |
| **Participant characteristics** | **Demographic variables**: mean age 63.1, 13 women (61.9%), 20 (95.2%) of white race, 1 (4.7%) of Hispanic/Latino ethnicity, 16 (76.2%) had college or higher level of education, 15 (71.4%) were married, 14 (66.7%) chose PA as their priority health behaviour, mean minutes/week of MVPA (moderate-vigorous PA) 116.2, mean BMI 33.5  **MetS components**: 19 (90.4%) had hypertension, 19 (90.4%) had hyperlipidemia, 14 (66.7%) had insulin resistance, 4 (22%) were taking metformin  **Psychiatric conditions**: 3 (14.3%) suffered from depression and 4 (19.0%) from anxiety  **Psychosocial variables**: mean score for optimism on Life Orientation Test-Revised (LOTR, range 6-15) 11.4, mean score for positive affect on Positive and Negative Affect Schedule (PANAS, range 26-41) 35.2, mean score for mental health-related QoL on Short Form Survey, Mental Component Summary (SF-12, MCS, range 0-100) was 48.5, mean score for physical health-related QoL on SF-12, Physical Component Summary (SF-12, PCS, range 0-100) was 46.4. |
| **Outcomes and methods of analysis**  **Results** | |
| **Brief description of method and process of analysis** | 1-hour semi-structured individual telephone interviews based on 6 topics of questioning. Content analysis was completed and data coded using predetermined coding framework, inductive and deductive methods, independently by 2 raters, analysis of 2 of the 6 topics as per scope of the paper |
| **Key themes and quotes** | Positive psychological constructs associated with PA: PA leads to positive psychological constructs, Positive psychological constructs lead to physical activity, Positive affect, Determination and optimism, Connectedness.  Motivation and facilitators for PA: Overall health benefits, Physical independence with respect to aging, Relaxation, Spousal support, Social support. Barriers: Perceived lack of willpower, Low motivation to begin or maintain PA, Low self-efficacy, Lack of social support, Life stress, Stress related to competing demands.  “I’m definitely in a better mood when I’m engaged in a physical activity and then for a short period of time thereafter. […] I’m more positive. I’m a clearer thinker” (54 year-old male).  “Yeah, if I would, let’s say, start walking, then I would look forward to doing it and enjoy it.” (67 year-old female).  “Perhaps, what I like about the way I feel is, after I do a good bit of exercise, I’m very relaxed” (59 year-old female).  “When you’re positive, you’re more active to go into exercise in full-force” (72 year-old female). [see paper for more quotes] |
| **Notes by review team** | |
| **Limitations** | Predetermined interview structure may have led to finding expected associations |
| **Future research recommendations** | Future research could include a proof-of-concept trial of an intervention to increase positive psychological constructs with the goal of increasing PA |
| **Source of funding** | Government (National Heart, Lung and Blood Institute, and National Institute of Diabetes and Digestive and Kidney Diseases, National Institute of Health) and charity (American Diabetes Association) |

Key: PA, physical activity; MetS, metabolic syndrome; IDF, International Diabetes Foundation; BMI, body mass index; QoL, quality of life.

Table 4. Strength of evidence for determinants across quantitative studies, using a modified GRADE approach34

|  | *n* | No. of studies | P | Initial rating | SL | IC | ID | IP | PB | ES | ER | GRADE Rating |
| --- | --- | --- | --- | --- | --- | --- | --- | --- | --- | --- | --- | --- |
| Age | 548 | 3 | 1 | Moderate | -1 | 0 | 0 | 0 | -1 | 0 | 0 | Very low |
| Gender | 766 | 4 | 1 | Moderate | -1 | 0 | 0 | 0 | -1 | 0 | 0 | Very low |
| Ethnicity | 338 | 2 | 1 | Moderate | -1 | 0 | 0 | 0 | -1 | 0 | 0 | Very low |
| Education | 378 | 2 | 1 | Moderate | -1 | 0 | 0 | 0 | -1 | 0 | 0 | Very low |
| Body mass index | 338 | 2 | 1 | Moderate | -1 | 0 | 0 | 0 | -1 | 0 | 0 | Very low |
| Self-rated health | 218 | 1 | 1 | Moderate | -1 | -1 (n/a) | 0 | 0 | -1 | 0 | 0 | Very low |
| Exercise at baseline | 170 | 1 | 1 | Moderate | -1 | -1 (n/a) | 0 | 0 | -1 | 0 | 0 | Very low |
| Smoking | 210 | 1 | 1 | Moderate | 0 | -1 (n/a) | 0 | 0 | -1 | 0 | 0 | Very low |
| Waist circumference | 168 | 1 | 1 | Moderate | -1 | -1 (n/a) | 0 | 0 | -1 | 0 | 0 | Very low |
| Systolic blood pressure | 210 | 1 | 1 | Moderate | 0 | -1 (n/a) | 0 | 0 | -1 | 0 | 0 | Very low |
| Diastolic blood pressure | 210 | 1 | 1 | Moderate | 0 | -1 (n/a) | 0 | 0 | -1 | 0 | 0 | Very low |
| High density lipoprotein cholesterol | 210 | 1 | 1 | Moderate | 0 | -1 (n/a) | 0 | 0 | -1 | 0 | 0 | Very low |
| Precipitation | 218 | 1 | 1 | Moderate | -1 | -1 (n/a) | 0 | 0 | -1 | 0 | 0 | Very low |
| Distance to coast | 218 | 1 | 1 | Moderate | -1 | -1 (n/a) | 0 | 0 | -1 | 0 | 0 | Very low |
| Healthy routes contained or intersected by buffer | 218 | 1 | 1 | Moderate | -1 | -1 (n/a) | 0 | 0 | -1 | 0 | 0 | Very low |
| Distance to nearest sports facility | 218 | 1 | 1 | Moderate | -1 | -1 (n/a) | 0 | 0 | -1 | 0 | 0 | Very low |
| Distance to nearest beach | 218 | 1 | 1 | Moderate | -1 | -1 (n/a) | 0 | 0 | -1 | 0 | 0 | Very low |
| Distance to nearest park | 218 | 1 | 1 | Moderate | -1 | -1 (n/a) | 0 | 0 | -1 | 0 | 0 | Very low |
| Walk-friendly routes contained or intersected by buffer | 218 | 1 | 1 | Moderate | -1 | -1 (n/a) | 0 | 0 | -1 | 0 | 0 | Very low |
| No. sports facilities contained or intersected by buffer | 218 | 1 | 1 | Moderate | -1 | -1 (n/a) | 0 | 0 | -1 | 0 | 0 | Very low |
| No. parks contained or intersected by buffer | 218 | 1 | 1 | Moderate | -1 | -1 (n/a) | 0 | 0 | -1 | 0 | 0 | Very low |
| Areas of parks contained or intersected by buffer | 218 | 1 | 1 | Moderate | -1 | -1 (n/a) | 0 | 0 | -1 | 0 | 0 | Very low |
| No. public open spaces (POS) contained or intersected by buffer | 218 | 1 | 1 | Moderate | -1 | -1 (n/a) | 0 | 0 | -1 | 0 | 0 | Very low |
| Areas of POS contained or intersected by buffer | 218 | 1 | 1 | Moderate | -1 | -1 (n/a) | 0 | 0 | -1 | 0 | 0 | Very low |
| Consciousness raising (undertaking to find out more about exercise behaviour) | 218 | 1 | 1 | Moderate | 0 | -1 (n/a) | 0 | 0 | -1 | 0 | 0 | Very low |
| Dramatic relief (caring about the consequences of inactivity or nonexercise) | 218 | 1 | 1 | Moderate | 0 | -1 (n/a) | 0 | 0 | -1 | 0 | 0 | Very low |
| Self-re-evaluation (seeing oneself as an active person) | 218 | 1 | 1 | Moderate | 0 | -1 (n/a) | 0 | 0 | -1 | 0 | 0 | Very low |
| Self-liberation (choosing and making commitment to change) | 218 | 1 | 1 | Moderate | 0 | -1 (n/a) | 0 | 0 | -1 | 0 | 0 | Very low |
| Stimulus control (avoiding or controlling stimuli or other causes that support inactivity or nonexercise) | 218 | 1 | 1 | Moderate | 0 | -1 (n/a) | 0 | 0 | -1 | 0 | 0 | Very low |
| Reporting of positives of adopting or maintaining exercise behaviour | 218 | 1 | 1 | Moderate | 0 | -1 (n/a) | 0 | 0 | -1 | 0 | 0 | Very low |
| Reporting of arguments against adopting or maintaining exercise behaviour | 218 | 1 | 1 | Moderate | 0 | -1 (n/a) | 0 | 0 | -1 | 0 | 0 | Very low |
| Self-efficacy | 218 | 1 | 1 | Moderate | 0 | -1 (n/a) | 0 | 0 | -1 | 0 | 0 | Very low |

Key: *n*, number of participants; P, phase of investigation SL, study limitations; IC, inconsistency; ID, indirectness; IP, imprecision; PB, publication bias; ES, effect size; ER, exposure-response gradient.

Table 5. CERQual Evidence Profile – strength of evidence for determinants across qualitative studies, using the GRADE-CERQual approach as described by Lewin et al.35

| Summary of review finding | Studies contributing to review finding | Methodological limitations | Coherence | Adequacy | Relevance | CERQual assessment of confidence in the evidence | Explanation of CERQual assessment |
| --- | --- | --- | --- | --- | --- | --- | --- |
| Health benefits and physical independence with respect to aging as motivators for PA | 1 | Serious concerns – one study with major methodological limitations | No concerns – review finding only based on this paper, and findings are clear & cogent | Serious concerns – only 1 study | No or very minor concerns – 95% white population | Low confidence | 1 study with major methodological limitations.  Data from one geographical region and in a majority (95.2%) white population.  No concerns about coherence. |
| Perceived lack of willpower and low motivation to begin or maintain PA as barriers to PA |
| Life stress and stress related to competing demands as barriers to PA |
| Low self-efficacy as a barrier to PA |
| Social support |
| Positive psychological constructs |

Key: PA, physical activity.

Table 6. Summary of results for all quantitative and qualitative studies broken down by determinant

| Study:  Determinant: | Abuissa et al. 200538 | Colom et al. 201940 | Jansen et al. 201339 | Kim et al. 201042 | Millstein et al. 202043 |
| --- | --- | --- | --- | --- | --- |
| **Demographic Characteristics** | | | | | |
| Older age | Significant, positive | Not evaluated | Not significant | Not significant | Not evaluated |
| Female gender | Not significant | Significant, positive (for OM-MVPA but not brisk walking) | Significant, negative | Not significant | Not evaluated |
| Ethnicity | Not significant | - | Not significant | - | Not evaluated |
| Education | - | Not evaluated | Not significant | Not significant | Not evaluated |
| **General Health Parameters** | | | | | |
| Higher BMI | Significant, positive | - | Significant, negative | - | Not evaluated |
| Self-rated health | - | Significant, negative | - | - | - |
| Exercise at baseline | Significant, negative | - | - | Not evaluated | Not evaluated |
| Smoking | Not evaluated | - | - | Not significant | - |
| **MetS-specific Characteristics** | | | | | |
| Waist circumference | - | - | Not significant (increase or decrease in PA) | Not evaluated | - |
| Systolic BP | Not evaluated | - | Not evaluated | Not significant | Not evaluated |
| Diastolic BP | Not evaluated | - | Not evaluated | Not significant | Not evaluated |
| HDL-C | - | - | Not evaluated | Significant, negative | Not evaluated |
| **Geographical Factors** | | | | | |
| Precipitation | - | Not significant | - | - | - |
| Distance to coast | - | Not significant | - | - | - |
| Healthy routes contained or intersected by buffer | - | Not significant | - | - | - |
| Distance to nearest sports facility | - | Not significant | - | - | - |
| Distance to nearest beach | - | Not significant | - | - | - |
| Distance to nearest park | - | Not significant | - | - | - |
| Walk-friendly routes contained or intersected by buffer | - | Not significant (for 500m buffer)  Significant, negative for OM-MVPA (for 1000m buffer)  Significant, negative for OM-MVPA in non-rainy periods | - | - | - |
| No. sports facilities contained or intersected by buffer | - | Not significant | - | - | - |
| No. parks contained or intersected by buffer | - | Not significant | - | - | - |
| Areas of parks contained or intersected by buffer | - | Not significant | - | - | - |
| No. Public Open Spaces (POS) contained or intersected by buffer | - | Not significant | - | - | - |
| Areas of POS contained or intersected by buffer | - | Not significant | - | - | - |
| **Psychological Factors** | | | | | |
| Consciousness raising (undertaking to find out more about exercise behaviour) | - | - | - | Significant, negative | - |
| Dramatic relief (caring about the consequences of inactivity or nonexercise) | - | - | - | Not significant | Health benefits and physical independence with respect to aging as motivators for PA |
| Self-re-evaluation (seeing oneself as an active person) | - | - | - | Significant, negative | - |
| Self-liberation (choosing and making commitment to change) | - | - | - | Significant, negative | Perceived lack of willpower and low motivation to begin or maintain PA as barriers to PA |
| Stimulus control (avoiding or controlling stimuli or other causes that support inactivity or nonexercise) | - | - | - | Not significant | Life stress and stress related to competing demands as barriers to PA |
| Reporting of positives of adopting or maintaining exercise behaviour | - | - | - | Significant, positive | PA led to positive psychological constructs (feeling good etc.), positive psychological constructs led to PA.  Motivators and facilitators for PA: health benefits, physical independence with respect to aging, relaxation, spousal support, social support |
| Reporting of arguments against barriers to adopting or maintaining exercise behaviour | - | - | - | Significant, positive | Barriers to PA: perceived lack of willpower, low motivation to begin or maintain PA, low self-efficacy, lack of social support, life stress, stress related to competing demands |
| Self-efficacy | - | - | - | Not significant | Low self-efficacy as a barrier to PA |
| Social support | - | - | - | - | Lack of social support as a barrier to PA |
| Positive psychological constructs | - | - | - | - | PA leads to positive psychological constructs, positive psychological constructs lead to PA |

Key: OM-MVPA, objectively measured moderate to vigorous physical activity; MetS, metabolic syndrome; PA, physical activity.

Direction of significance with respect to non-adherence.
